# Supplementary material for: Development of Genotype-Specific Anti-Bovine Rotavirus A Immunoglobulin Yolk Based on a Current Molecular Epidemiological Analysis of Bovine Rotaviruses A Collected in Japan during 2017–2020
Source: PubMed Central journal article supplement (PMC7761885; doi:10.3390/v12121386), 2020-12-03
Supplement: viruses-12-01386-s001.pdf [file viruses-12-01386-s001.pdf]

**Supplementary Table 1.** Ten bovine rotavirus A strains used in this study for cross-reactivity of anti- bovine rotavirus A immunoglobulin Y in neutralization assay.

| Strains <sup>a</sup> | Origin            | Age [Day] | Area     | Collection year | G and P genotype |
|----------------------|-------------------|-----------|----------|-----------------|------------------|
| SMN-1                | Japanese beef     | <10       | Shimane  | 1977            | G6P[1]           |
| HKD6                 | Holstein          | 7         | Hokkaido | 2017            | G6P[11]          |
| HKD7                 | Holstein          | 9         | Hokkaido | 2017            | G6P[11]          |
| HKD17                | Holstein          | 12        | Hokkaido | 2017            | G6P[11]          |
| HKD18                | Holstein          | < 7       | Hokkaido | 2018            | G6P[5]           |
| SMN35                | Japanese beef     | 13        | Shimane  | 2018            | G6P[5]           |
| KK-3                 | Japanese beef     | Unknown   | Unknown  | 1983            | G10P[11]         |
| OKY31                | F1 hybrid         | 9         | Okayama  | 2017            | G10P[11]         |
| Dai-10               | Asymptomatic calf | Unknown   | Hyogo    | 2007            | G24P[33]         |
| MYG-1                | Adult cow         | Unknown   | Miyagi   | 2017            | G8P[14]          |

<sup>a</sup> HKD6, HKD7, HKD17, HKD18, OKY31, and SMN35 were isolated in this study. KK-3 and SMN-1, originally providing from the National Institute of Animal Health (Tsukuba, Ibaraki, Japan), were maintained in our laboratory. The two remaining bovine RVA strains (MYG-1 and Dai-10) were kindly gifted from Dr. Matsuo, and Dr. Sugiyama from Sendai Livestock Hygiene Center (Sendai, Miyagi, Japan), and Gifu University (Gifu, Gifu, Japan), respectively.
